# Supplementary material for: Therapeutic Immunization with HIV-1 Tat Reduces Immune Activation and Loss of Regulatory T-Cells and Improves Immune Function in Subjects on HAART
Source: PLoS One. 2010 Nov 11;5(11):e13540. doi: 10.1371/journal.pone.0013540 (PMC2978690; doi:10.1371/journal.pone.0013540)
Supplement: Table S1 — Baseline characteristics of study participants in ISS OBS T-002 for the Total Subjects and the Reference Group. (0.04 MB DOC) [file pone.0013540.s011.doc]

**Table S1.** Baseline characteristics of study participants in ISS OBS T-002 for the Total Subjects and the Reference Group.

|  | **Total Subjects** | **Reference Group** |
| --- | --- | --- |
|  | (*n* = 88)a | (*n* = 32)a |
| Age (yr)b |  |  |
| Mean  s.d. | 44  8 | 42  6 |
| Range | 26-65 | 30-55 |
| Sex (%) |  |  |
| Male | 75.6 | 68.8 |
| Female | 24.4 | 31.2 |
| CD4+ nadir (cells/l) |  |  |
| Mean  s.d. | 205  141 | 356  102 |
| Range | 2-612 | 253-612 |
| Time since diagnosis of HIV (yr)c |  |  |
| Mean  s.d. | 10  7 | 12  6 |
| Range | 1-23 | 2-21 |
| Time since HAART initiation (yr) |  |  |
| Mean  s.d. | 6  5 | 7  5 |
| Range | 0-21 | 1-19 |
| Current HAART regimen (%)d |  |  |
| Includes PI | 35.6 | 25.8 |
| Includes NNRTI | 56.3 | 58.1 |
| Includes NRTI | 8.1 | 16.1 |

a**Number of individuals.**

bBased on 87 individuals for the Total Subjects.

cBased on 77 individuals for the Total Subjects and on 27 individuals for the Reference Group.

dBased on 87 individuals for the Total Subjects and on 31 individuals for the Reference Group.
