# Supplementary material for: Therapeutic Immunization with HIV-1 Tat Reduces Immune Activation and Loss of Regulatory T-Cells and Improves Immune Function in Subjects on HAART
Source: PLoS One. 2010 Nov 11;5(11):e13540. doi: 10.1371/journal.pone.0013540 (PMC2978690; doi:10.1371/journal.pone.0013540)
Supplement: Table S2 — Immune activation markers and T-regs at baseline in subjects of ISS OBS T-002. (0.04 MB DOC) [file pone.0013540.s012.doc]

**Table S2.** Immune activation markers and T-regs at baseline in subjects of ISS OBS T-002.

|  |  | **Total Subjects** |  | **Reference Group** |
| --- | --- | --- | --- | --- |
|  | *n* | Mean  s.e. | *n* | Mean  s.e. |
| CD38+HLA-DR- on CD8+ T cells (%) | 16 | 32.8  2.8 | 6 | 34.3  4.7 |
| HLA-DR+CD38- on CD8+ T cells (%) | 16 | 14.4  1.6 | 6 | 15.6  2.6 |
| CD38+HLA-DR+ on CD8+ T cells (%) | 16 | 16.7  2.6 | 6 | 15.3  2.9 |
| CD38+ HLA-DR- on CD4+ T cells (%) | 16 | 51.6  4.1 | 6 | 54.4  2.3 |
| HLA-DR+CD38- on CD4+ T cells (%) | 16 | 6.6  1.1 | 6 | 6.3  1.0 |
| CD38+HLA-DR+ on CD4+T cells (%) | 16 | 4.6  1.0 | 6 | 3.9  0.8 |
| 2-microglobulin (mg/L) | n.d. | n.d. | 30 | 1.9  0.1 |
| Neopterin (nmol/L) | n.d. | n.d. | 30 | 6.0  0.3 |
| Total IgM (mg/dL) | n.d. | n.d. | 30 | 110  9 |
| Total IgG (mg/dL) | n.d. | n.d. | 30 | 1308  51 |
| Total IgA (mg/dL) | n.d. | n.d. | 30 | 283  29 |
| CD25+ on CD4+ T cells (%) | 34 | 9.0  0.4 | 20 | 9.0  0.4 |
| FOXP3+ on CD4+CD25+ T cells (%) | 31 | 34.3  2.2 | 19 | 36.6  2.8 |
| CD25+FOXP3+ on CD4+ T cells (%) | 31 | 2.8  0.2 | 19 | 2.9  0.2 |
| CD25+FOXP3+ on CD4+ T cells (cells/μl) | 25 | 22.6  2.2 | 15 | 27.6  2.7 |

Mean values ( standard error) of immune activation markers and T-regs up to at week 48. *n* indicates the number of individuals tested for each parameter. n.d. not done.
